# Supplementary material for: A sensitive red/far-red photoswitch for controllable gene therapy in mouse models of metabolic diseases
Source: PubMed Central journal article supplement — Nat Commun. 2024 Nov 27;15:10310. doi: 10.1038/s41467-024-54781-2 (PMC11603164; doi:10.1038/s41467-024-54781-2), 2024-11-27
Supplement: 41467_2024_54781_MOESM2_ESM.pdf [file 41467_2024_54781_MOESM2_ESM.pdf]

## **Description of Additional Supplementary Files**

File Name: Supplementary Data 1

Description: Plasmids designed and used in this study.

File Name: Supplementary Data 2

Description: Amino acid and DNA sequence information of REDLIP.

File Name: Supplementary Data 3

Description: Expression vectors and transfection mixtures used in the main figures.

File Name: Supplementary Data 4

Description: Expression vectors and transfection mixtures used in supplementary figures.
