# Supplementary material for: A sensitive red/far-red photoswitch for controllable gene therapy in mouse models of metabolic diseases
Source: PubMed Central journal article supplement — Nat Commun. 2024 Nov 27;15:10310. doi: 10.1038/s41467-024-54781-2 (PMC11603164; doi:10.1038/s41467-024-54781-2), 2024-11-27
Supplement: 41467_2024_54781_MOESM7_ESM.pdf [file 41467_2024_54781_MOESM7_ESM.pdf]

## Reporting Summary

Nature Portfolio wishes to improve the reproducibility of the work that we publish. This form provides structure for consistency and transparency in reporting. For further information on Nature Portfolio policies, see our [Editorial Policies](#) and the [Editorial Policy Checklist](#).

### Statistics

For all statistical analyses, confirm that the following items are present in the figure legend, table legend, main text, or Methods section.

- |                                     |                                                                                                                                                                                                                                                                                                |
|-------------------------------------|------------------------------------------------------------------------------------------------------------------------------------------------------------------------------------------------------------------------------------------------------------------------------------------------|
| n/a                                 | Confirmed                                                                                                                                                                                                                                                                                      |
| <input type="checkbox"/>            | <input checked="" type="checkbox"/> The exact sample size ( $n$ ) for each experimental group/condition, given as a discrete number and unit of measurement                                                                                                                                    |
| <input type="checkbox"/>            | <input checked="" type="checkbox"/> A statement on whether measurements were taken from distinct samples or whether the same sample was measured repeatedly                                                                                                                                    |
| <input type="checkbox"/>            | <input checked="" type="checkbox"/> The statistical test(s) used AND whether they are one- or two-sided<br><i>Only common tests should be described solely by name; describe more complex techniques in the Methods section.</i>                                                               |
| <input checked="" type="checkbox"/> | <input type="checkbox"/> A description of all covariates tested                                                                                                                                                                                                                                |
| <input checked="" type="checkbox"/> | <input type="checkbox"/> A description of any assumptions or corrections, such as tests of normality and adjustment for multiple comparisons                                                                                                                                                   |
| <input type="checkbox"/>            | <input checked="" type="checkbox"/> A full description of the statistical parameters including central tendency (e.g. means) or other basic estimates (e.g. regression coefficient) AND variation (e.g. standard deviation) or associated estimates of uncertainty (e.g. confidence intervals) |
| <input type="checkbox"/>            | <input checked="" type="checkbox"/> For null hypothesis testing, the test statistic (e.g. $F$ , $t$ , $r$ ) with confidence intervals, effect sizes, degrees of freedom and $P$ value noted<br><i>Give <math>P</math> values as exact values whenever suitable.</i>                            |
| <input checked="" type="checkbox"/> | <input type="checkbox"/> For Bayesian analysis, information on the choice of priors and Markov chain Monte Carlo settings                                                                                                                                                                      |
| <input checked="" type="checkbox"/> | <input type="checkbox"/> For hierarchical and complex designs, identification of the appropriate level for tests and full reporting of outcomes                                                                                                                                                |
| <input checked="" type="checkbox"/> | <input type="checkbox"/> Estimates of effect sizes (e.g. Cohen's $d$ , Pearson's $r$ ), indicating how they were calculated                                                                                                                                                                    |

*Our web collection on [statistics for biologists](#) contains articles on many of the points above.*

### Software and code

Policy information about [availability of computer code](#)

#### Data collection

SEAP expression level in culture media, insulin, TSLP and TGs expression levels in mice were quantified using a Synergy H1 hybrid multi-mode microplate reader with Gen5 software (version: 2.04).  
qPCR reaction were performed on the LightCycler®96 real-time PCR instrument (Roche, Switzerland).  
Fluorescence image of EGFP expression cells were performed with an inverted fluorescence microscope [ChemiScope 4300 Pro imaging equipment (Cinix, China)].  
Confocal fluorescence image of EGFP and mcherry expression cells were performed with a Leica TCS SP8 CARS confocal microscope (TCS SP8 CARS, Leica).  
Bioluminescence images of the mice were obtained using IVIS Lumina II in vivo imaging system (Perkin Elmer, USA).  
Liver histology imaging were obtained on an upright microscope (BX53, Olympus).

#### Data analysis

We used GraphPad (version 8) to perform statistical analysis.  
Bioluminescence values of the mice were analyzed using Living Image® 4.3.1 software.

For manuscripts utilizing custom algorithms or software that are central to the research but not yet described in published literature, software must be made available to editors and reviewers. We strongly encourage code deposition in a community repository (e.g. GitHub). See the Nature Portfolio [guidelines for submitting code & software](#) for further information.

## Data

Policy information about [availability of data](#)

All manuscripts must include a [data availability statement](#). This statement should provide the following information, where applicable:

- Accession codes, unique identifiers, or web links for publicly available datasets
- A description of any restrictions on data availability
- For clinical datasets or third party data, please ensure that the statement adheres to our [policy](#)

All data associated with this study are present in the paper or the Supplementary Information. All genetic components related to this paper are available with a material transfer agreement and can be requested from H.Y. (hfye@bio.ecnu.edu.cn). Source data are provided with this paper.

## Research involving human participants, their data, or biological material

Policy information about studies with [human participants or human data](#). See also policy information about [sex, gender \(identity/presentation\), and sexual orientation](#) and [race, ethnicity and racism](#).

|                                                                    |       |
|--------------------------------------------------------------------|-------|
| Reporting on sex and gender                                        | None. |
| Reporting on race, ethnicity, or other socially relevant groupings | None. |
| Population characteristics                                         | None. |
| Recruitment                                                        | None. |
| Ethics oversight                                                   | None. |

Note that full information on the approval of the study protocol must also be provided in the manuscript.

## Field-specific reporting

Please select the one below that is the best fit for your research. If you are not sure, read the appropriate sections before making your selection.

- Life sciences       Behavioural & social sciences       Ecological, evolutionary & environmental sciences

For a reference copy of the document with all sections, see [nature.com/documents/nr-reporting-summary-flat.pdf](https://nature.com/documents/nr-reporting-summary-flat.pdf)

## Life sciences study design

All studies must disclose on these points even when the disclosure is negative.

|                 |                                                                                                                                                                                                                                                                                                                                                                      |
|-----------------|----------------------------------------------------------------------------------------------------------------------------------------------------------------------------------------------------------------------------------------------------------------------------------------------------------------------------------------------------------------------|
| Sample size     | No statistical methods were used to predetermine sample size. For vitro study, at least three biologically independent experimental replicates were performed for statistical analyses, according to standard scientific conventions. For in vivo study, n=4 or n=5 or n=6 or n=7 mouse per group were used are based on the need for proper statistical evaluation. |
| Data exclusions | No data were excluded.                                                                                                                                                                                                                                                                                                                                               |
| Replication     | The number of independent experiments is specified in each figure legend, with at least 3 independent experiments, unless otherwise specified.                                                                                                                                                                                                                       |
| Randomization   | All the animals and cells were randomly assigned to experimental groups.                                                                                                                                                                                                                                                                                             |
| Blinding        | For all the animal and cell experiments, the investigators were blinded to the group allocations during data analysis.                                                                                                                                                                                                                                               |

## Reporting for specific materials, systems and methods

We require information from authors about some types of materials, experimental systems and methods used in many studies. Here, indicate whether each material, system or method listed is relevant to your study. If you are not sure if a list item applies to your research, read the appropriate section before selecting a response.

## Materials &amp; experimental systems

| n/a                                 | Involvement                                                     |
|-------------------------------------|-----------------------------------------------------------------|
| <input checked="" type="checkbox"/> | <input type="checkbox"/> Antibodies                             |
| <input type="checkbox"/>            | <input checked="" type="checkbox"/> Eukaryotic cell lines       |
| <input checked="" type="checkbox"/> | <input type="checkbox"/> Palaeontology and archaeology          |
| <input type="checkbox"/>            | <input checked="" type="checkbox"/> Animals and other organisms |
| <input checked="" type="checkbox"/> | <input type="checkbox"/> Clinical data                          |
| <input checked="" type="checkbox"/> | <input type="checkbox"/> Dual use research of concern           |
| <input checked="" type="checkbox"/> | <input type="checkbox"/> Plants                                 |

## Methods

| n/a                                 | Involvement                                     |
|-------------------------------------|-------------------------------------------------|
| <input checked="" type="checkbox"/> | <input type="checkbox"/> ChIP-seq               |
| <input checked="" type="checkbox"/> | <input type="checkbox"/> Flow cytometry         |
| <input checked="" type="checkbox"/> | <input type="checkbox"/> MRI-based neuroimaging |

## Eukaryotic cell lines

Policy information about [cell lines and Sex and Gender in Research](#)

|                                                                   |                                                                                                                                                                                                                                      |
|-------------------------------------------------------------------|--------------------------------------------------------------------------------------------------------------------------------------------------------------------------------------------------------------------------------------|
| Cell line source(s)                                               | Hana3A cells and human mesenchymal stem cells (hMSC-TERT) were obtained from Professor Dr. Martin Fussenegger Department of Biosystems Science and Engineering, ETH Zürich. The HEK-293T, HeLa, ATDC5 cells were obtained from ATCC. |
| Authentication                                                    | None of the cell lines are authenticated.                                                                                                                                                                                            |
| Mycoplasma contamination                                          | No mycoplasma contamination was detected for all cell lines.                                                                                                                                                                         |
| Commonly misidentified lines (See <a href="#">ICLAC</a> register) | No misidentified cell lines have been used in this study.                                                                                                                                                                            |

## Animals and other research organisms

Policy information about [studies involving animals](#); [ARRIVE guidelines](#) recommended for reporting animal research, and [Sex and Gender in Research](#)

|                         |                                                                                                                                    |
|-------------------------|------------------------------------------------------------------------------------------------------------------------------------|
| Laboratory animals      | C57BL/6 mice (male, 4/6-week-old) were purchased from the ECNU (East China Normal University) Laboratory Animal Center.            |
| Wild animals            | None.                                                                                                                              |
| Reporting on sex        | All studies using C57BL/6 mice employed male mice.                                                                                 |
| Field-collected samples | None.                                                                                                                              |
| Ethics oversight        | The protocol involved in this study was approved by the ECNU Animal Care and Use Committee (protocol ID: m20220505, R +RB20210101) |

Note that full information on the approval of the study protocol must also be provided in the manuscript.

## Plants

|                       |       |
|-----------------------|-------|
| Seed stocks           | None. |
| Novel plant genotypes | None. |
| Authentication        | None. |
